# Supplementary material for: Synthesis of Quaternary (Ni, Co, Cu)Se2 Nanosheet Arrays on Carbon Cloth for Non-Enzymatic Glucose Determination
Source: MDPI journal article supplement (doi:10.3390/chemosensors11100530), 2023-10-09
Supplement: s1 [file s1]

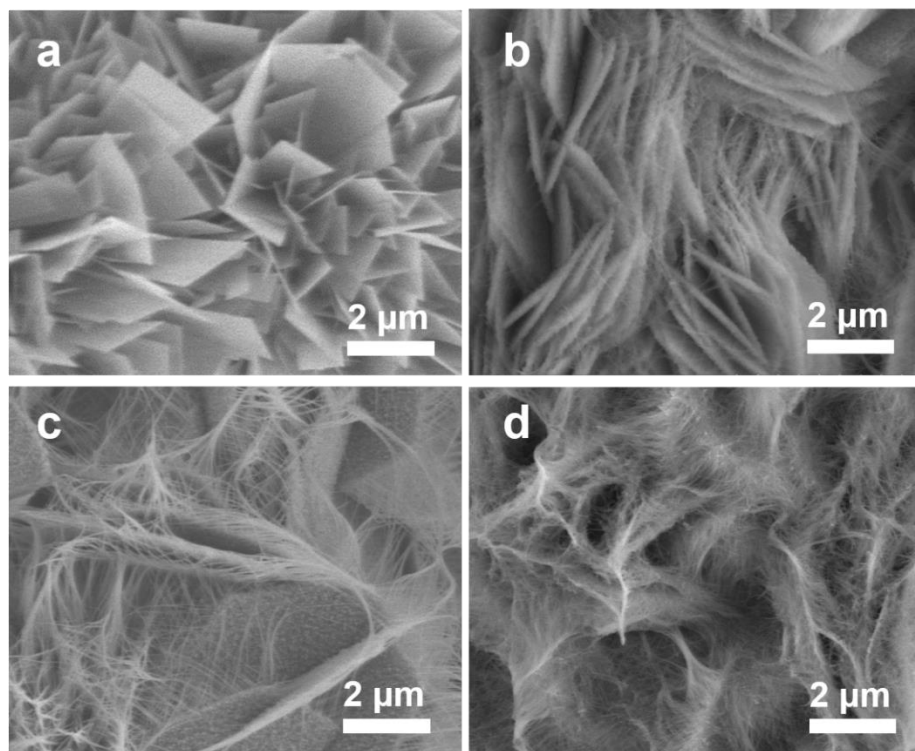

**Figure S1.** (a–d) SEM images of (Ni, Co, Cu)-LDH arrays with Cu: Co: Ni ratios of 1:1:1, 1:1:3, 1:1:4, 1:1:5.

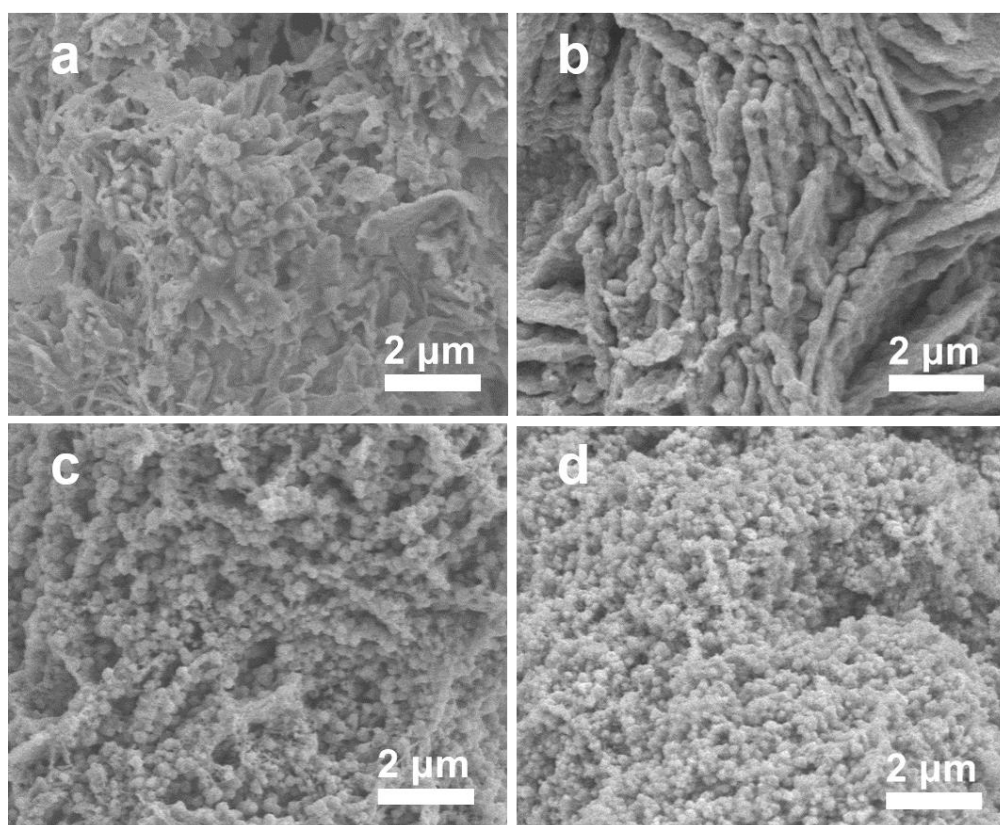

**Figure S2.** (a–d) SEM images of (Ni, Co, Cu)Se<sub>2</sub> arrays with Cu: Co: Ni ratios of 1:1:1, 1:1:3, 1:1:4, 1:1:5.

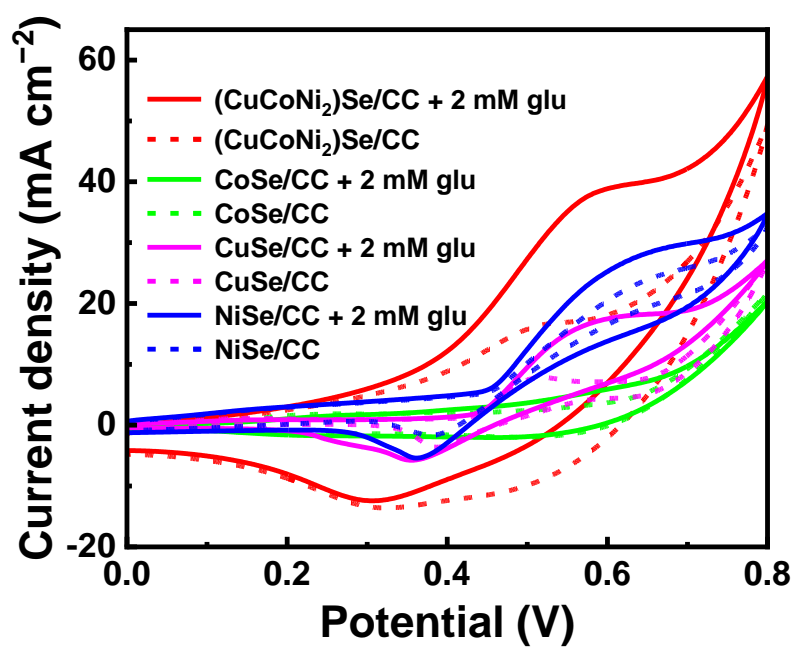

**Figure S3.** Response curves of (Cu, Co, Ni)Se<sub>2</sub>/CC, CoSe/CC, CuSe/CC, NiSe/CC to add 0 mM and 2 mM glucose in 0.1 M NaOH solution.

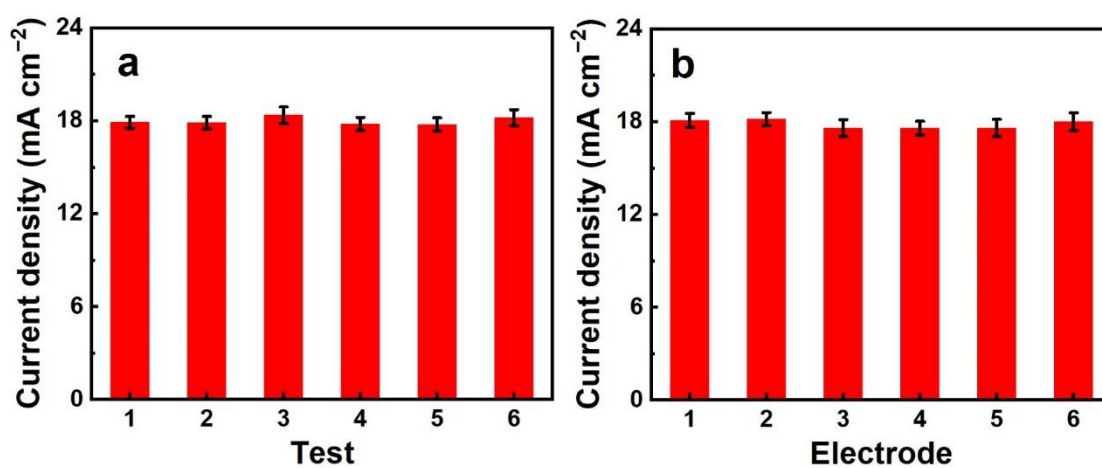

**Figure S4.** The repeatability (a) and reproductivity (b) of (Ni, Co, Cu)Se<sub>2</sub>/CC electrode to glucose sensing.
